# Supplementary material
Source: PubMed Central journal article supplement (PMC7612756)
Supplement: EMS145043-supplement-Figues_S1_4.pdf [file EMS145043-supplement-Figues_S1_4.pdf]

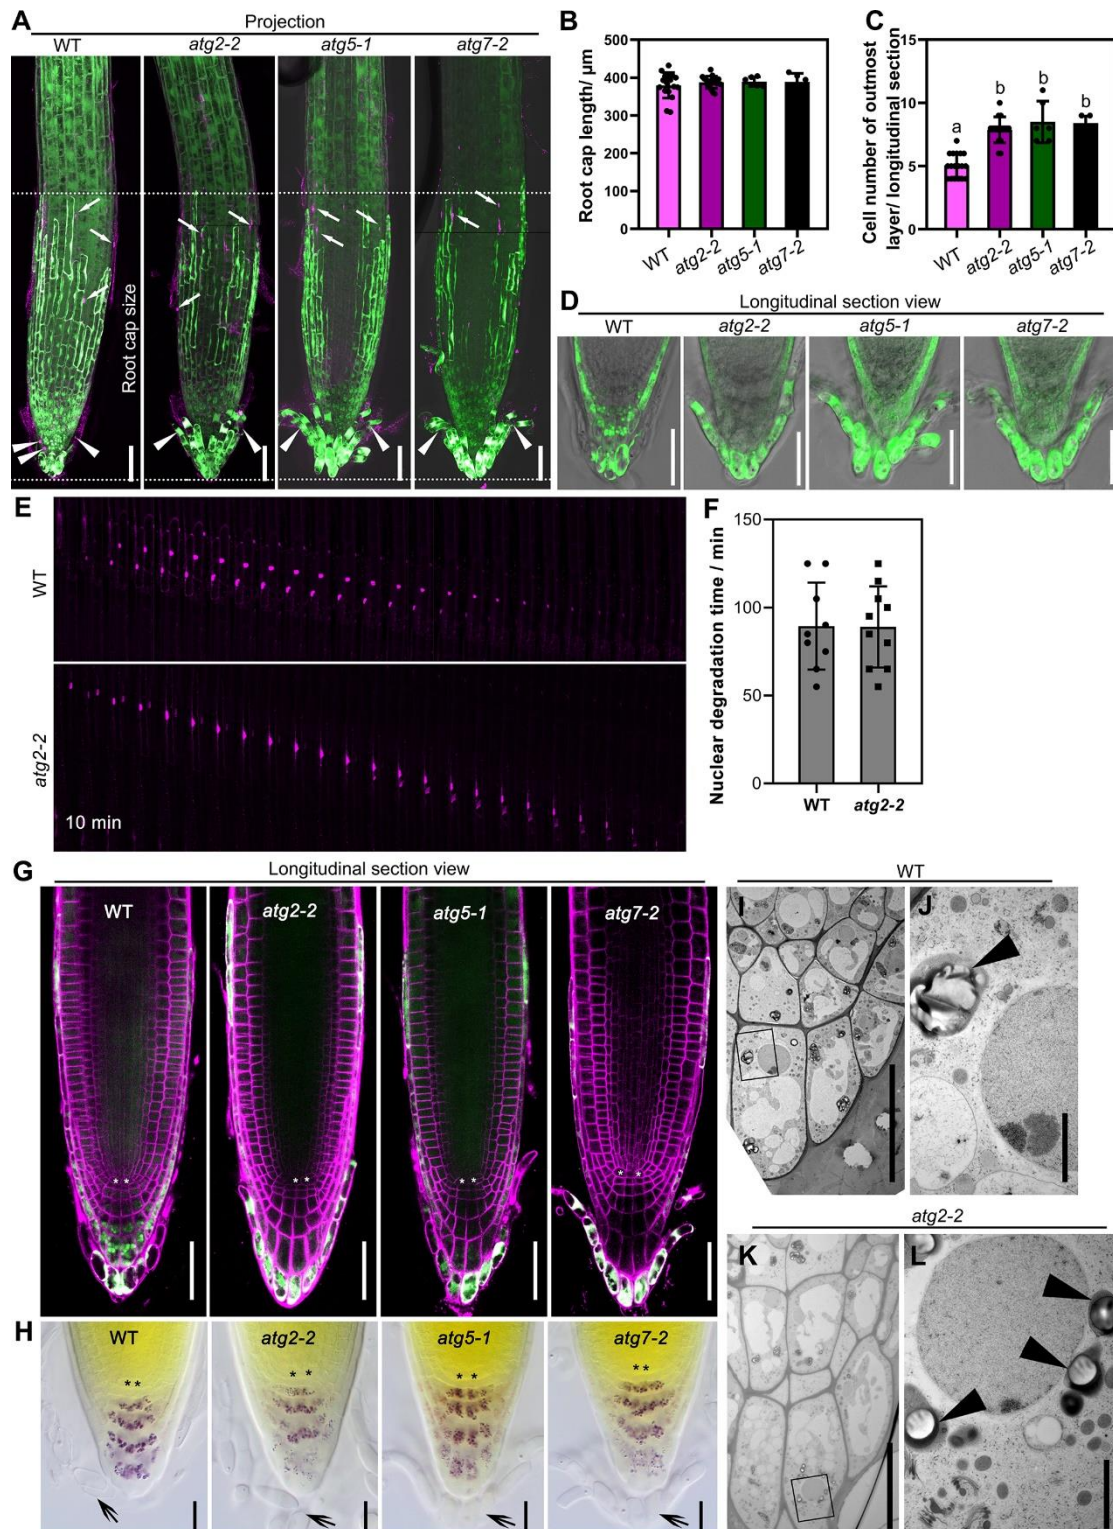

**Figure S1 Distal LRC PCD and root cap development occur independent of autophagy. Related to Figure 2.**

(A) CLSM (z-stack) of root tips from 5 DAG seedlings of wild type, *atg2-2*, *atg5-1* and *atg7-2*, pulse labeled with FDA and PI. White arrowheads indicate PI-stained nuclei in distal LRC cells and white arrows indicate proximal LRC cells. Scale bars are 50  $\mu$ m.

(B) Quantification of root cap size of wild type and *atg* mutants. Results are means  $\pm$  SD. N = 17 for WT, 18 for *atg2-2*, 6 for *atg5-1*, 5 for *atg7-2*.

(C) Cell number quantification of the outmost root cap layer of wild type and *atg* mutants on longitudinal sections. Results are means  $\pm$  SD. N = 18 for WT, 16 for *atg2-2*, 6 for *atg5-1* and 5 for *atg7-2*. Each mutant is significantly different from the wild type, as indicated by different letters (one-way ANOVA, Dunnett's multiple comparison test,  $P < 0.05$ ).

(D) Longitudinal section of wild type and *atg* mutants, pulse labeled with FDA. Single optical section in (D) and maximal z section projection in (A) are generated from the same root. Scale bars are 50  $\mu\text{m}$ .

(E) Kymograph showing nuclear degradation in *atg2-2* mutant compared with the wild type. Cells were imaged in 5 min intervals for 2 h after staining with PI (magenta).

(F) Quantification of the time of nuclear degradation shown in (A). Results are means  $\pm$  SD. 10 cells from 4 roots counted for each genotype. There is not significant difference in wild type and *atg2-2* mutant ( $t$  test,  $P > 0.05$ ).

(G) Longitudinal sections of Arabidopsis roots at 5 DAG pulse labeled with FDA (green) and FM4-64 (magenta). White asterisks indicate quiescent center cells (QC). Scale bars are 50  $\mu\text{m}$ .

(H) Iodine-stained roots of the wild type and *atg* mutants at 5 DAG. Black asterisks indicate quiescent center cells (QC). Arrows point to the outermost root cap layer in which statoliths are degraded. Scale bars are 20  $\mu\text{m}$ .

(I-F) TEM micrograph of columella cells in wild-type (I-J) and *atg2-2* mutant (K-L) at 5 DAG. Close-up area were shown for wild-type (J) and *atg2-2* (L).

Black arrowheads indicate statoliths containing bright starch granules. Scale bars are 20  $\mu\text{m}$  (I and K), 2  $\mu\text{m}$  (J and L).

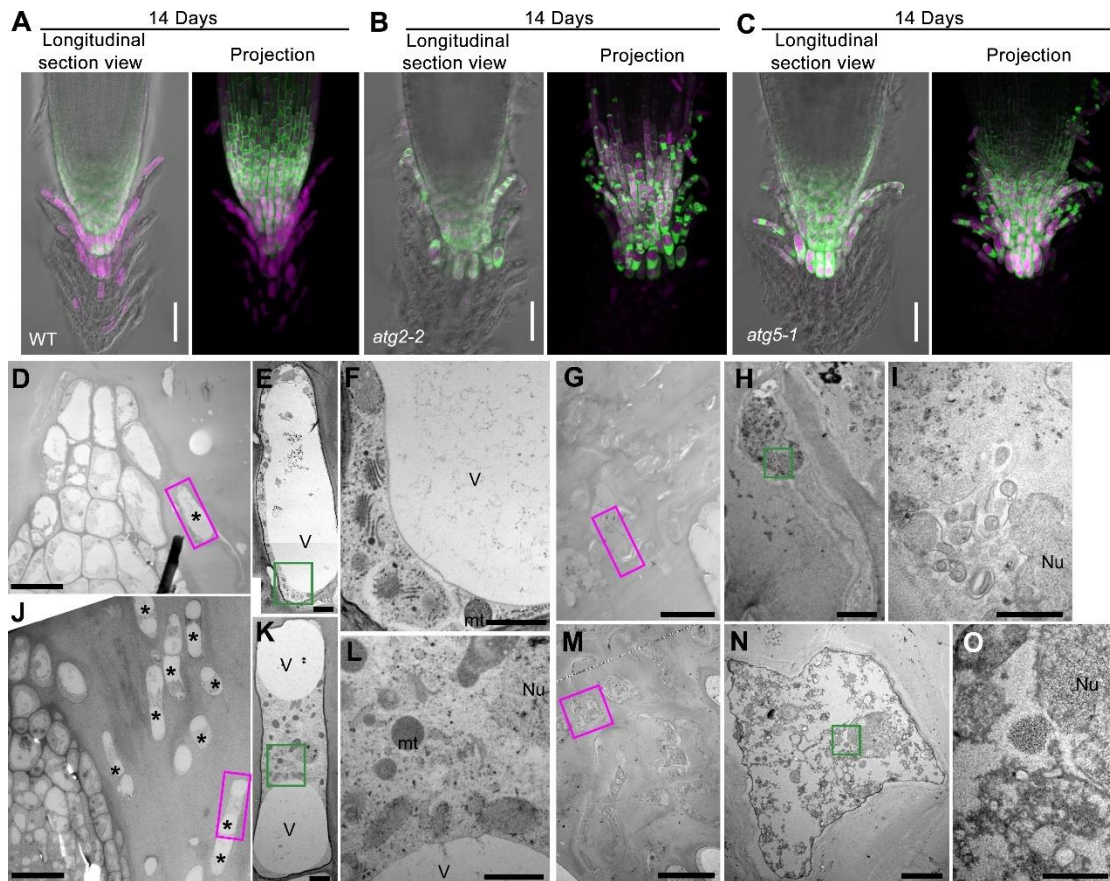

**Figure S2 Autophagy regulates PCD onset in proximal LRC cells and corpse clearance in columella cells. Related to Figure 2.**

(A-C) pUBQ10::ToIM expression in the wild type (A), *atg2-2* (B), and *atg5-1* (C) was analyzed at 14 DAG. Cytoplasmic EGFP signal is shown in green, and vacuolar mRFP signal is shown in magenta. Scale bars are 50 μm.

(D-O) TEM of wild type (D-I) and *atg2-2* (J-O) seedlings at 14 DAG. Closeups of the wild type (E) and *atg2-2* (K) show viable proximal LRC cells that are indicated by magenta frames in (D) and (J), respectively; closeups of the wild type (F) and *atg2-2* (L) indicated by the green frames in (E) and (K), respectively. Closeups of the wild type (H) and *atg2-2* (N) showing dead columella cells indicated by magenta frames in (G) and (M), respectively; closeups of the wild type (I) and *atg2-2* (O) indicated by green frames in (H) and (N), respectively. The asterisks indicate alive proximal LRC cells. V: vacuole, mt: mitochondria, Nu: nucleus or nuclear remnant. Scale bars are 20 μm for D, G, J and M, 2 μm for E, H, K, and N, 1 μm for F and L, and 500 nm for I and O.

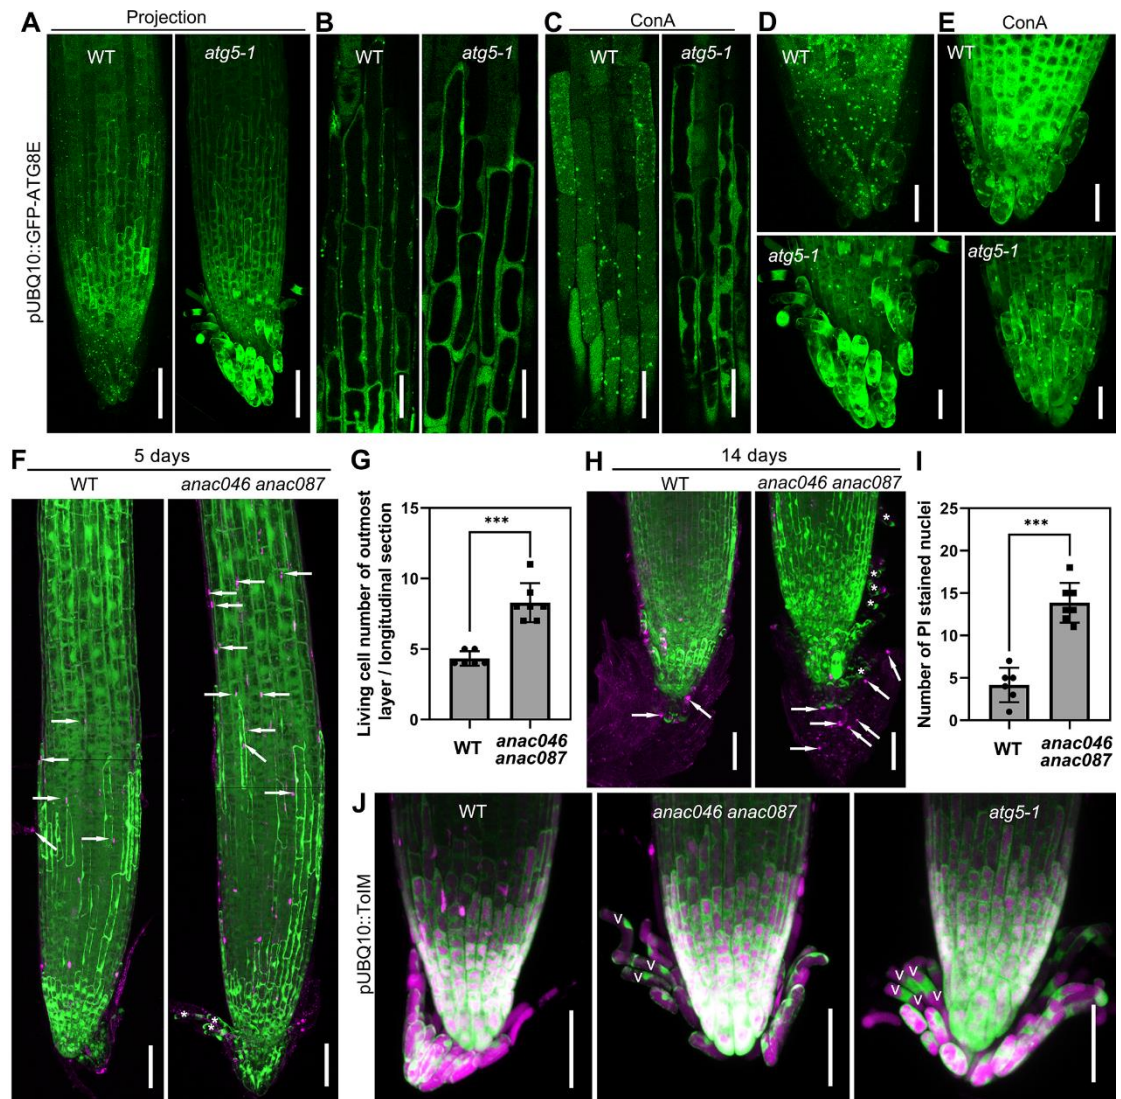

**Figure S3 Expression of pUBQ10::GFP-ATG8E in the wild type and *atg5-1*, and phenotypic analyses of the *anac046 anac087* mutant. Related to Figure 3.**

(A) CLSM (z-stack projection) of root tips of wild type and *atg5-1* seedlings at 5 DAG expressing GFP-ATG8E. Scale bars are 50  $\mu$ m.

(B-C) Distal LRC cells of wild type and *atg5-1* seedlings at 5 DAG expressing GFP-ATG8E (B), treated with 1  $\mu$ M ConA for 8 h (C). Scale bars are 20  $\mu$ m.

(D-E) Proximal LRC and columella cells of wild type (top row) and *atg5-1* (bottom row) seedlings at 5 DAG expressing GFP-ATG8E (D), treated with 1  $\mu$ M ConA for 8 h (E). z-stack projection. Scale bars are 50  $\mu$ m.

(F) CLSM (z-stack projection) of root tips of wild type and *anac046 anac087* mutant seedlings at 5 DAG, stained with FDA and PI. White arrows point to cell corpses in distal LRC cells. Asterisks indicate viable proximal LRC cells. Scale bars are 50  $\mu$ m.

(G) Quantification of viable cells in the outermost root cap cell layer of wild type and *anac046 anac087* mutant seedlings at 5 DAG counted on longitudinal root sections. Results are means  $\pm$  SD. N = 6 roots for WT, 7 roots for *anac046 anac087*. \*\*\* indicates a significant difference (*t* test,  $P < 0.001$ ).

(H) CLSM (z-stack projection) of root tips from 14 DAG seedlings of wild type and *anac046 anac087* mutant, stained with FDA and PI. White arrows point cell corpse in columella cells. Asterisks point alive proximal LRC cells. Scale bars are 50  $\mu$ m.

(I) Quantification of PI-positive (dead but non-degraded) cells in columella cells of wild type and *anac046 anac087* mutant seedlings, as shown in (H). Results are means  $\pm$  SD. N = 6 roots for WT, 7 roots for *anac046 anac087*. \*\*\* indicates a significant difference (*t* test,  $P < 0.001$ ).

(J) Tonoplast integrity marker in wild type, *anac046 anac087* mutant and *atg5-1* mutant seedlings at 5 DAG. V: vacuole. Scale bars are 50  $\mu$ m.

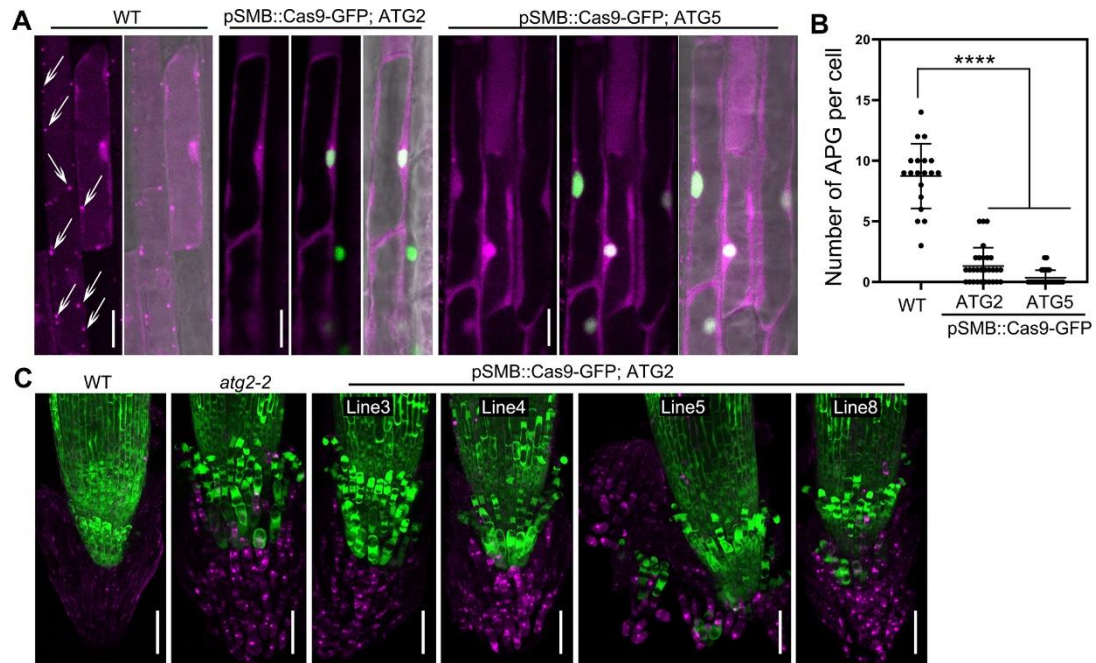

**Figure S4 Root cap specific CRISPR-TSKO of ATG mimics the *atg* phenotype. Related to Figure 4.**

(A) CLSM of LRC cells from 4 DAG seedlings expressing p35S::mCherry-ATG8E in wild type, and in the CRISPR-TSKO lines pSMB::Cas9-GFP;ATG2 and pSMB::Cas9-GFP;ATG5. mCherry signal is shown in magenta, GFP signal is shown in green. White arrows indicate autophagosomes. Scale bars are 20  $\mu$ m.

(B) Quantification of autophagosome (APG) in LRC cells. Results are means  $\pm$  SD. N = 19 cells from 6 roots for WT, 29 cells from 9 roots for pSMB::Cas9-GFP;ATG2, and 26 cells from 9 roots for pSMB::Cas9-GFP;ATG5. \*\*\*\* indicates a significant difference (*t* test,  $P < 0.0001$ ).

(C) CLSM (z-stack projection) of root tips of seedlings carrying a pSMB::NLS-GFP construct at 14 DAG. From left to right: wild type (WT), *atg2-2*, and four independent lines carrying a root cap-specific CRISPR-TSKO construct targeting ATG2 (pSMB::Cas9-GFP;ATG2), pulse labeled with FDA (green) and PI (magenta). Scale bars are 50  $\mu$ m.
